# Supplementary material for: Transcriptome analysis in roots and leaves of wheat seedlings in response to low-phosphorus stress
Source: PubMed Central journal article supplement (PMC6930268; doi:10.1038/s41598-019-56451-6), 2019-12-24
Supplement: 41598_2019_56451_MOESM1_ESM.pdf [file 41598_2019_56451_MOESM1_ESM.pdf]

# Transcriptome analysis in roots and leaves of wheat seedlings in response to low-phosphorus stress

Jun Wang<sup>1,6†</sup>, Qin Qin<sup>1,2,3,4,5†</sup>, Jianjun Pan<sup>6</sup>, Lijuan Sun<sup>1,2,3,4,5</sup>, Yafei Sun<sup>1,2,3,4,5</sup>, Yong Xue<sup>1,2,3,4,5,6\*</sup> & Ke Song<sup>1,2,3,4,5\*</sup>

**Table S1.** Primer information for qRT-PCR

| Primer             | Forward (5'→3')        | Reverse (5'→3')          |
|--------------------|------------------------|--------------------------|
| WRKY1A             | GCATGGACTGCCTTTTCGAG   | GATGCTCTGTTCGTCGTCCT     |
| Peroxidase         | GAAGATGGACGAGTGAAGATG  | CAGACCTCTCACCTAATCCTAACA |
| WIR1               | AGCCTCGCTCGAATCATCAG   | GGTTAGGGTCGAAAGCACCA     |
| Carbonic anhydrase | CCGCAACATCGCCAACAT     | GAGTGAGAGGAGAGCCTTGATT   |
| MLO-like protein   | CTTCCTCATAACCTCACACTCT | ACCTTGGCGATGCTCACT       |
| NIP5-1             | ATTCCACTCCCCGTTTCCTG   | GTTGGATCTGGGTCGATGCT     |
| Nitrate reductase  | CACCTCCACGCCCTTCAT     | ATCCACGCCGACTCCTTG       |
| HKT8               | GACGACAGTGACCAACAAGT   | ACGGCGATGAAGATGGCC       |
| RLI                | TTGAGCAACTCATGGACCAG   | GCTTTCCAAGGCACAAACAT     |
